# Supplementary material for: Sandwich crystals of butyl paraben
Source: Royal Society of Chemistry journal article supplement (doi:10.1039/c4ce01320d), 2014-01-01
Supplement: c4ce01320d1.pdf [file c4ce01320d1.pdf]

Supporting Information Available

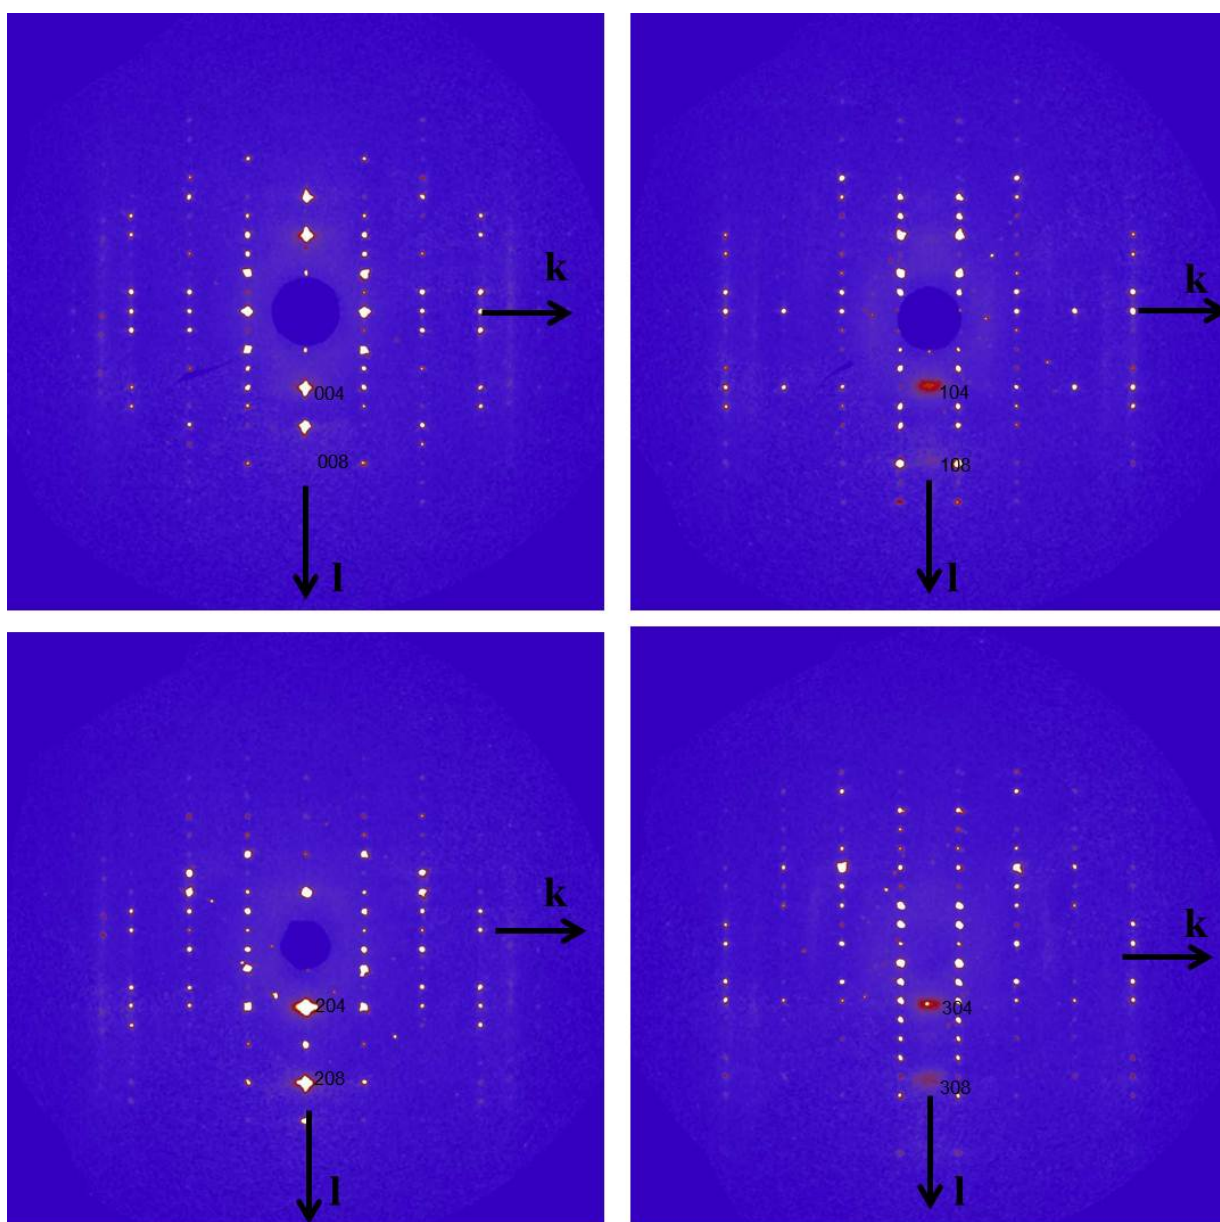

**Figure 19.** Single crystal diffraction unwarped image along  $a^*$ . a)  $0kl$ ; b)  $1kl$ ; c)  $2kl$ ; d)  $3kl$ .

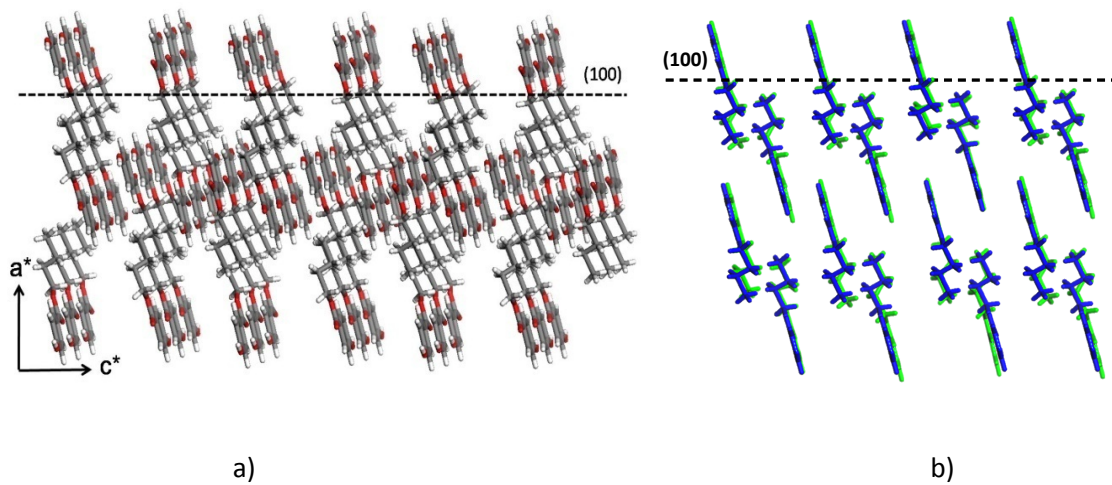

**Figure 20.** The parallel plane of (100). a) and blue in b): in perfect crystal structure.

Green in b): schema of flexible of carbon tail in sandwich crystal.

Figure 20 a) shows the perfect crystal molecules stacking in plane of (100), and Figure 20 b) shows the schema that the carbon tail in sandwich crystal (green) is different (distance or angle between carbon atoms) with the carbon tail in perfect crystals (blue).
